# Supplementary material
Source: PubMed Central journal article supplement (PMC2759192)
Supplement: NIHMS47572-supplement-01.pdf [file NIHMS47572-supplement-01.pdf]

## Supplemental Data

### Human Cytomegalovirus Protein UL38 Inhibits

### Host Cell Stress Responses by Antagonizing

### the Tuberous Sclerosis Protein Complex

Nathaniel J. Moorman, Ileana M. Cristea, Scott S. Terhune, Michael P. Rout, Brian T. Chait, and Thomas Shenk

#### Supplemental Experimental Procedures

##### Construction of Viruses with tagged proteins

BAD*in*UL38TAP was prepared by modification of a BAC clone of BAD*wt*, pAD/Cre (Yu et al., 2002), in *E. coli* by using linear recombination (Borst et al., 2001). PCR amplification was used to generate a targeting cassette for recombination. The template for amplification contained a TAP tag followed by a kanamycin cassette flanked by FRT sites. PCR primers were as follow:  
5'TCGTGTACACGGCCGGGGAGGGCGACGTGGTACAGATGGTGGTTCGTGGTCCGCGGAAG  
AAGATGGAAAAAG 3' and  
5'ACTACAAAAAAAAAAGCTGAACATGGTCATCTAGCAGCAAAGTTCTCCTTCGTCGTGG  
AATGCCTTCG3'. The underlined segments represent sequence homologous to the viral sequence at the 3' end of the UL38 ORF. After construction, the BAC DNA was purified, checked for genomic integrity by restriction digestion, and the TAP-tagged UL38 locus sequenced. UL38TAP BAC DNA was introduced into fibroblasts by electroporation to generate stocks of BAD*in*UL38TAP virus, and yields were determined by plaque assay on fibroblasts. Expression of UL38TAP protein after infection with the recombinant virus was confirmed by Western blot using anti-Protein A antibody (Sigma; data not shown). BAD*in*UL99GFP is a derivative of BAD*wt* containing a GFP tag fused to the C-terminus of the UL99 ORF, which was prepared using the same approach as for BAD*in*UL38TAP. BAD*in*UL99GFP replicates in fibroblasts with wild-type kinetics (data not shown).

##### Purification and identification of pUL38-interacting proteins by mass spectroscopy

Frozen HCMV-infected cell pellets were loaded in round-bottom eppendorf tubes with one 2 mm stainless steel grinding ball placed in the middle of the sample. The cryogenic lysis (Cristea et al., 2006) was performed in 6 steps of 3 min each at 30 Hz using the Retsch MM 301 Mixer Mill. The ground cell powder was homogenized in lysis buffer. Several buffers were tested to obtain an efficient protein extraction and maintain viral-host protein interactions. The optimized lysis buffer chosen for this study was 20 mM K-HEPES, pH 7.4, 110 mM KOAc, 2 mM MgCl<sub>2</sub>, 0.1% Tween-20, 1% Triton, 0.25 M NaCl, 1/100 (v/v) protease inhibitor mixture (20 mg/mL PMSF + 0.4 mg/mL pepstatin A), and 1/200 (v/v) protease inhibitor cocktail (Sigma). M-270 Epoxy Dynabeads (Invitrogen) were coupled to IgG (MP Biomedicals) using 7 µg IgG/mg of beads (Cristea et al., 2005). Immunoaffinity purifications were performed by using the protein A tag, employing 1 h incubations of the cellular lysate with conjugated magnetic beads (Cristea et al., 2006; Cristea et al., 2005). Isolated proteins were resolved by electrophoresis on a 4-12% NuPAGE Novex Bis-Tris pre-cast 1-DE gel

(Invitrogen), and stained with Coomassie blue (Pierce). The entire gel lane was cut into 1-2 mm pieces and proteins were digested with trypsin (Promega). The resulting peptides were extracted on reverse phase resin (Poros 20 R2; PerSeptive Biosystems) and subjected to matrix-assisted laser desorption (MALDI) mass spectrometric analysis (Cristea et al., 2004). An in-house built MALDI interface was coupled to either a QqToF instrument (QqTOF Centaur, MDS Sciex) for peptide fingerprinting (MS) (Krutchinsky et al., 2000) or an ion trap (LCQDECAXP<sup>PLUS</sup>, Finnigan, Thermo Fisher Scientific) for amino acid sequence analysis (MS/MS) (Krutchinsky et al., 2001). XProteo (<http://www.xproteo.com>) and ProFound (<http://prowl.rockefeller.edu>) algorithms (Zhang and Chait, 2000) were used to correlate peptide mass fingerprint data and tandem MS CID data with human and viral databases to identify proteins (Cristea et al., 2004). Only proteins confirmed by MS/MS analyses were included in the results.

### **Protein analysis**

For immunoprecipitation experiments (Wang and Shenk, 2005), frozen cell pellets were resuspended in 1 ml RIPA buffer (Tris-HCl, 50 mM, pH 7.4; 1% NP-40; 0.25% Na-deoxycholate; 150 mM NaCl; 1 mM EDTA). Lysates were sonicated and incubated on ice for 30 min with vortexing for 5 sec every 5 min. Insoluble material was pelleted by centrifugation at 16,000 x g for 5 min at 4°C. Lysates were precleared for 30 min with Protein A/G Sepharose with rotation at 4°C. Antibodies were added, and the sample was incubated for 1 h at 4°C with rotation. Protein A/G Sepharose (Santa Cruz) in RIPA buffer was added, and the sample was incubated for 1 h at 4°C with rotations. The Sepharose was pelleted and washed 5 times with RIPA buffer. Following the final wash, residual buffer was removed and the sepharose was resuspended in sample buffer, boiled at 100°C for 5 min, and insoluble material pelleted by spinning for 3 min at room temperature at 16,000 x g. Protein concentrations were determined using the Bradford assay (Bio-Rad). Samples were resolved on 10% SDS-containing polyacrylamide gels, and proteins were identified by Western blot.

Western blots assays (Munger et al., 2006) were performed with rabbit polyclonal antibodies in 1X TBST buffer (1X TBS, 0.1% Tween 20) with 5% bovine serum albumin (BSA) overnight at 4°C with rocking. Western blots were performed with mouse monoclonal antibodies in 1X TBST with 1% BSA for 1 h at room temperature. Appropriate secondary antibody was used at 1:5000 dilution in 1X TBST plus 1%BSA for 1 h at room temperature. Antibody complexes on blots were visualized using ECL Reagent (GE Healthcare Bio-Sciences).

For immunofluorescent analysis (Sharon-Friling et al., 2006), fibroblasts were grown to confluence on glass coverslips in six-well plates. At 24 h after infection with HCMV at 0.01 PFU/cell, cells were washed in PBS, fixed for 15 min in 2% paraformaldehyde, and permeabilized for 15 min in 0.1% Triton X-100. After washing with PBS-T (PBS containing 0.2% Tween 20), the cells were incubated for 30 min in PBS-blocking buffer (PBS containing 2% bovine serum albumin and 0.2% Tween 20) and incubated with either a mouse or rabbit primary antibody in PBS blocking buffer for 1 h at room temperature. After further washing with PBS-T, slides were incubated for 30 min at room temperature with either goat anti-mouse or goat-anti rabbit immunoglobulin Alexa 488, 546 or 633 (Invitrogen). The second antibody was supplemented with 4',6'-diamidino-2-phenylindole dihydrochloride (DAPI; Invitrogen) and Lectin HPA (Invitrogen). Cells were washed with PBS-T, mounted and viewed using a Zeiss LSM510. Quantitative estimates of protein colocalization (Costes et al., 2004) were performed using the Velocity software package (Improvision).

## Supplemental References

- Borst, E.M., Mathys, S., Wagner, M., Muranyi, W., and Messerle, M. (2001). Genetic evidence of an essential role for cytomegalovirus small capsid protein in viral growth. *J Virol* 75, 1450-1458.
- Costes, S.V., Daelemans, D., Cho, E.H., Dobbin, Z., Pavlakis, G., and Lockett, S. (2004). Automatic and quantitative measurement of protein-protein colocalization in live cells. *Biophys J* 86, 3993-4003.
- Cristea, I.M., Carroll, J.W., Rout, M.P., Rice, C.M., Chait, B.T., and Macdonald, M.R. (2006). Tracking and elucidating alphavirus-host protein interactions. *J Biol Chem*.
- Cristea, I.M., Gaskell, S.J., and Whetton, A.D. (2004). Proteomics techniques and their application to hematology. *Blood* 103, 3624-3634.
- Cristea, I.M., Williams, R., Chait, B.T., and Rout, M.P. (2005). Fluorescent proteins as proteomic probes. *Mol Cell Proteomics* 4, 1933-1941.
- Krutchinsky, A.N., Kalkum, M., and Chait, B.T. (2001). Automatic identification of proteins with a MALDI-quadrupole ion trap mass spectrometer. *Anal Chem* 73, 5066-5077.
- Krutchinsky, A.N., Zhang, W., and Chait, B.T. (2000). Rapidly switchable matrix-assisted laser desorption/ionization and electrospray quadrupole-time-of-flight mass spectrometry for protein identification. *J Am Soc Mass Spectrom* 11, 493-504.
- Munger, J., Yu, D., and Shenk, T. (2006). UL26-deficient human cytomegalovirus produces virions with hypophosphorylated pp28 tegument protein that is unstable within newly infected cells. *J Virol* 80, 3541-3548.
- Sharon-Friling, R., Goodhouse, J., Colberg-Poley, A.M., and Shenk, T. (2006). Human cytomegalovirus pUL37x1 induces the release of endoplasmic reticulum calcium stores. *Proc Natl Acad Sci U S A* 103, 19117-19122.
- Terhune, S., Torigoi, E., Moorman, N., Silva, M., Qian, Z., Shenk, T., and Yu, D. (2007). Human cytomegalovirus UL38 protein blocks apoptosis. *J Virol* 81, 3109-3123.
- Wang, D., and Shenk, T. (2005). Human cytomegalovirus virion protein complex required for epithelial and endothelial cell tropism. *Proceedings of the National Academy of Sciences of the United States of America* 102, 18153-18158.
- Yu, D., Smith, G.A., Enquist, L.W., and Shenk, T. (2002). Construction of a self-excisable bacterial artificial chromosome containing the human cytomegalovirus genome and mutagenesis of the diploid TRL/IRL13 gene. *J Virol* 76, 2316-2328.
- Zhang, W., and Chait, B.T. (2000). ProFound: an expert system for protein identification using mass spectrometric peptide mapping information. *Anal Chem* 72, 2482-2489.

| <b>Table S1.<br/>Proteins captured by pUL38TAP<sup>a</sup></b> |                                                                                                                 | <b>gi #</b> | <b># peptides<br/>from MS</b> | <b>% Sequence<br/>coverage</b> | <b>XProteo<br/>score</b> | <b>MS/MS<br/>confirm</b> | <b># peptides<br/>confirmed</b> | <b>Peptides confirmed<br/>by MS/MS</b>                                                |
|----------------------------------------------------------------|-----------------------------------------------------------------------------------------------------------------|-------------|-------------------------------|--------------------------------|--------------------------|--------------------------|---------------------------------|---------------------------------------------------------------------------------------|
| <b>Tag</b>                                                     | CTAP-tag [Cloning vector<br>pUAST-CTAP]                                                                         | 54306511    | 12                            | 77                             | 3.1                      | Y                        | 2                               | TAALAQHDEAVDNKFNK<br>NFIAVSAANR                                                       |
| <b>Viral</b>                                                   | UL38                                                                                                            | 1780815     | 7                             | 19                             | 7.4                      | Y                        | 2                               | IPMTFVDR<br>AILESER                                                                   |
| <b>HCMV</b>                                                    | UL29                                                                                                            | 29423462    | 16                            | 32                             | 13.3                     | Y                        | 2                               | LQPNVPLVHPDHR<br>YESIGPVDR                                                            |
|                                                                | UL28                                                                                                            | 28373247    | 6                             | 16                             | 2.9                      | Y                        | 2                               | DYVDEIVEGAWFK<br>HTFAGMYELSQLHDR                                                      |
|                                                                | UL52                                                                                                            | 52139239    | 8                             | 12                             | 5.8                      | N                        | n/a                             | n/a                                                                                   |
| <b>Host</b>                                                    | Tuberin                                                                                                         | 3522922     | 49                            | 28                             | 22.9                     | Y                        | 4                               | LESQAGQQVSR<br>HSYTLPIASSIR<br>DGWIQNLQALMER<br>ESSAAEAFR                             |
| <b>Homo<br/>Sapiens</b>                                        | PREDICTED: ubiquitin<br>specific protease 24                                                                    | 51458553    | 39                            | 17                             | 22.3                     | Y                        | 2                               | EFDYLPVDSR<br>VYDQTNPYTDVR                                                            |
|                                                                | PREDICTED: similar to<br>ubiquitin A-52 residue<br>ribosomal protein fusion<br>product 1                        | 51467509    | 9                             | 25                             | n/o                      | N                        | n/a                             | n/a                                                                                   |
|                                                                | similar to Ras GTPase-<br>activating protein 4<br>(RasGAP-activating-like<br>protein 2)                         | 89026715    | 5                             | 10                             | 3.4                      | Y                        | 2                               | YVELDPSK<br>DELDLQR                                                                   |
|                                                                | ubiquitin specific protease<br>9                                                                                | 2580558     | 18                            | 5                              | 8.5                      | Y                        | 4                               | DGLFDTIQR<br>ELLAFQTSEK<br>IELFVGGELIDSEDDR<br>ALTLQDLNIAAQAQAGK                      |
|                                                                | Chromodomain helicase-<br>DNA-binding protein 4<br>(CHD-4) (Mi-2<br>autoantigen 218 kDa<br>protein) (Mi2-beta)  | 5921744     | 46                            | 23                             | 19.9                     | Y                        | 5                               | APEPTPQQVAQQQ<br>LLEQALVIEEQLR*<br>ENEFSFEDNAIR<br>QELDDILK                           |
|                                                                | Chromodomain helicase-<br>DNA-binding protein 3<br>(CHD-3) (Mi-2<br>autoantigen 240 kDa<br>protein) (Mi2-alpha) | 88911273    | 31                            | 11                             | 8.6                      | Y                        | 6                               | MPDKDDIR<br>RDSEEEFGSER<br>LPYGAYEGGALIKSSGK<br>NFEALNSR<br>QSYWRHR<br>LLEQALVIEEQLR* |
|                                                                | chromodomain helicase<br>DNA binding protein 5                                                                  | 56417878    | 18                            | 11                             | 4.5                      | Y                        | 3                               | IYDIWHR<br>LLEQALVIEEQLR*<br>VGGNIEVLGFNAR*                                           |

|                                                                                             |          |     |     |      |   |     |                                                           |
|---------------------------------------------------------------------------------------------|----------|-----|-----|------|---|-----|-----------------------------------------------------------|
| HDAC1                                                                                       | 49456395 | 7   | 41  | 8.7  | Y | 4   | YGEYFPGTGDLR*<br>YYAVNYPLR<br>NSSNFKK<br>KEVTEEEK         |
| HDAC2                                                                                       | 55961192 | 12  | 24  | 10.8 | Y | 2   | YGEYFPGTGDLR*<br>YHSDEYIKFLR                              |
| MYST histone acetyltransferase (monocytic leukemia) 3                                       | 5803098  | 18  | 7   | 6.3  | Y | 4   | KPFLHRR<br>QSLNGPYMR<br>LNTKATNVDGK<br>DKPVAEPIPICSFCLGTK |
| MTA1                                                                                        | 2498589  | 12  | 16  | 5    | Y | 2   | QIDQFLVVAR*<br>YLETHPRPPKDPVK                             |
| MTA2                                                                                        | 4126710  | 23  | 39  | 4.2  | Y | 3   | QIDQFLVVAR*<br>LNPADAPNPVVFVATK<br>TLLADQGEIR             |
| ‡Chromatin assembly factor 1 subunit C (Retinoblastoma-binding protein 4) (RBBP-4) (RBAP48) | 1172846  | 12  | 30  | 12.2 | Y | 4   | VINEEYK*<br>INHEGEVNR*<br>RLNVWDLK*<br>TPSSDVLVFDYTK*     |
| ‡Retinoblastoma-binding protein 7 (RBBP-7) (Nucleosome remodeling factor subunit RBAP46)    | 2494891  | 7   | 28  | 1.2  | Y | 4   | VINEEYK*<br>INHEGEVNR*<br>RLNVWDLK*<br>TPSSDVLVFDYTK*     |
| Zinc finger protein 420                                                                     | 20072764 | 11  | 21  | 4.5  | N | n/a | n/a                                                       |
| MAP6 protein                                                                                | 39795300 | 14  | 21  | 9.3  | Y | 1   | DQGSVVPESLK                                               |
| microtubule-associated protein 6 isoform 1                                                  | 48375173 | n/o | n/o | n/o  | Y | 2   | DQGPTVLQPPKNQGR<br>GQGPMVQEPLKK                           |
| microtubule-associated protein 6 isoform 2                                                  | 48375167 | 8   | 27  | n/o  | Y | 1   | GEASKPTTANDK                                              |
| TBL2 protein                                                                                | 15277891 | 10  | 20  | 8.4  | N | n/a | n/a                                                       |
| annexin A2 isoform 1                                                                        | 50845388 | 11  | 30  | n/o  | Y | 1   | LSLEGDHSTPPSAYGSV<br>K                                    |
| HNRPM protein                                                                               | 33874022 | 6   | 12  | n/o  | N | n/a | n/a                                                       |
| HNRPH1                                                                                      | 48145673 | 4   | 10  | 3.3  | Y | 3   | YIEIFK<br>VHIEIGPDGR<br>HTGPNSPDTANDGFVR                  |
| heterogeneous nuclear ribonucleoprotein U isoform b                                         | 14141161 | n/o | n/o | n/o  | Y | 3   | FIEIAR<br>SGKNQFNR<br>DLPEHAVLK                           |
| 71 Kd heat shock cognate protein                                                            | 32467    | 11  | 18  | n/o  | Y | 2   | TTPSYVAFTDTER<br>GTLDPVEKALR                              |
| nebullette                                                                                  | 3660517  | 11  | 35  | n/o  | N | n/a | n/a                                                       |

|                                                    |                                                                              |          |     |     |      |   |     |                                                                                                                   |
|----------------------------------------------------|------------------------------------------------------------------------------|----------|-----|-----|------|---|-----|-------------------------------------------------------------------------------------------------------------------|
|                                                    | MAP3K7                                                                       | 56204061 | 6   | 16  | n/o  | Y | 3   | TNKHYSATW<br>QIESESER<br>SFAGTVAWMAPEVIR                                                                          |
|                                                    | WDR66 protein                                                                | 23271967 | n/o | n/o | n/o  | Y | 3   | GDLFVLR<br>RVSDIQSK<br>VKLFNATTK                                                                                  |
|                                                    | golgi antigen gcp372                                                         | 808869   | 39  | 12  | 7.7  | N | n/a | n/a                                                                                                               |
|                                                    | GATA zinc finger domain containing 2B = transcription repressor p66          | 21218438 | 8   | 16  | 7.8  | Y | 2   | SLDPADERDDVLAK<br>SLDPADER                                                                                        |
|                                                    | Golgin subfamily A member 4 (Trans-Golgi p230) (256 kDa golgin) (Golgin-245) | 12643718 | 27  | 8   | n/o  | Y | 5   | ELENTALELSQK<br>EIEILTQK<br>LLDQEAQ<br>DAKNLIEQLEQDK<br>EREVHILEEK                                                |
|                                                    | Histone H2A.5                                                                | 29553970 | 3   | 27  | 0.9  | Y | 3   | AGLQFPVGR<br>VTIAQGGVLPNIQAVLLP<br>K<br>HLQLAIR                                                                   |
|                                                    | Histone H2B                                                                  | 1568557  | 5   | 33  | 3.2  | Y | 2   | LLPGELAK<br>KESYSVYVYK                                                                                            |
|                                                    | Histone H4                                                                   | 48145673 | 5   | 40  | n/o  | Y | 1   | VFLENVIR                                                                                                          |
| Likely<br>contam-<br>inants<br><br>Homo<br>Sapiens | 52kD Ro/SSA autoantigen                                                      | 14790039 | 13  | 31  | 7.3  | Y | 1   | LQVALGELR                                                                                                         |
|                                                    | Lamin A protein                                                              | 386856   | 19  | 27  | 11.1 | Y | 2   | EELDFQKNIYSEELR<br>MQQQLDEYQELLDIK                                                                                |
|                                                    | myosin, heavy polypeptide 9, non-muscle                                      | 12667788 | 39  | 22  | 18.6 | Y | 7   | EAPSPEKTLPPQK<br>IAEFTTNLTETEEKSK<br>EQADFAIEALAKATYER<br>DVLLQVDDERR<br>VVFQEFR<br>DLGEELEALK<br>VSHLLGINVTDFTTR |
|                                                    | Vimentin                                                                     | 37852    | 36  | 65  | 15.2 | Y | 3   | LQEEMLQR<br>FADLSEANR<br>SLYASSPGGVYATR                                                                           |
|                                                    | ACTB protein                                                                 | 15277503 | 14  | 50  | 5.1  | Y | 1   | AGFAGDDAPR                                                                                                        |
|                                                    | SSA1                                                                         | 14994115 | 7   | 16  | n/o  | Y | 1   | LQVALGELR                                                                                                         |
|                                                    | Ig gamma heavy chain constant region                                         | 2136983  | 7   | 43  | n/o  | N | n/a | n/a                                                                                                               |

<sup>a</sup>The majority of listed proteins were first detected by MS analysis, and then confirmed through MS/MS analyses. Several proteins were not observed (n/o) at the MS analysis stage, or did not obtain a score from the MS analysis (not available; n/a), but were identified from the MS/MS analyses. The Xproteo scores obtained for the MS analyses are indicated. The score is calculated in two

steps. First, candidate proteins are ranked by probability scores calculated from an improved version of the Bayesian algorithm used in ProFound (71). Second, for each candidate protein the discriminability ( $d'$ ) score is calculated, illustrated in the table as the final XProteo score. Discriminability is defined as the normalized distance between the Gaussian score distributions of the proteins identified with high scores and the randomly matched proteins in units of standard deviation of the score distributions. The peptides confirmed by MS/MS analyses are indicated for each protein. Asterisks designate peptides common to several isoforms of the same protein, identified from different bands on the gel. However, the presence of the various shown isoforms was confirmed through MS/MS analyses of unique peptides. ‡, because of the similarity of the sequences of RbAp48 and RBAp46, either or both may be present.
